# Supplementary material
Source: ML conference proceedings conference paper supplement (https://proceedings.neurips.cc/paper_files/paper/2019/hash/bd4c9ab730f5513206b999ec0d90d1fb-Abstract.html)
Supplement: Supplementary file [file bd4c9ab730f5513206b999ec0d90d1fb-Supplemental.zip]

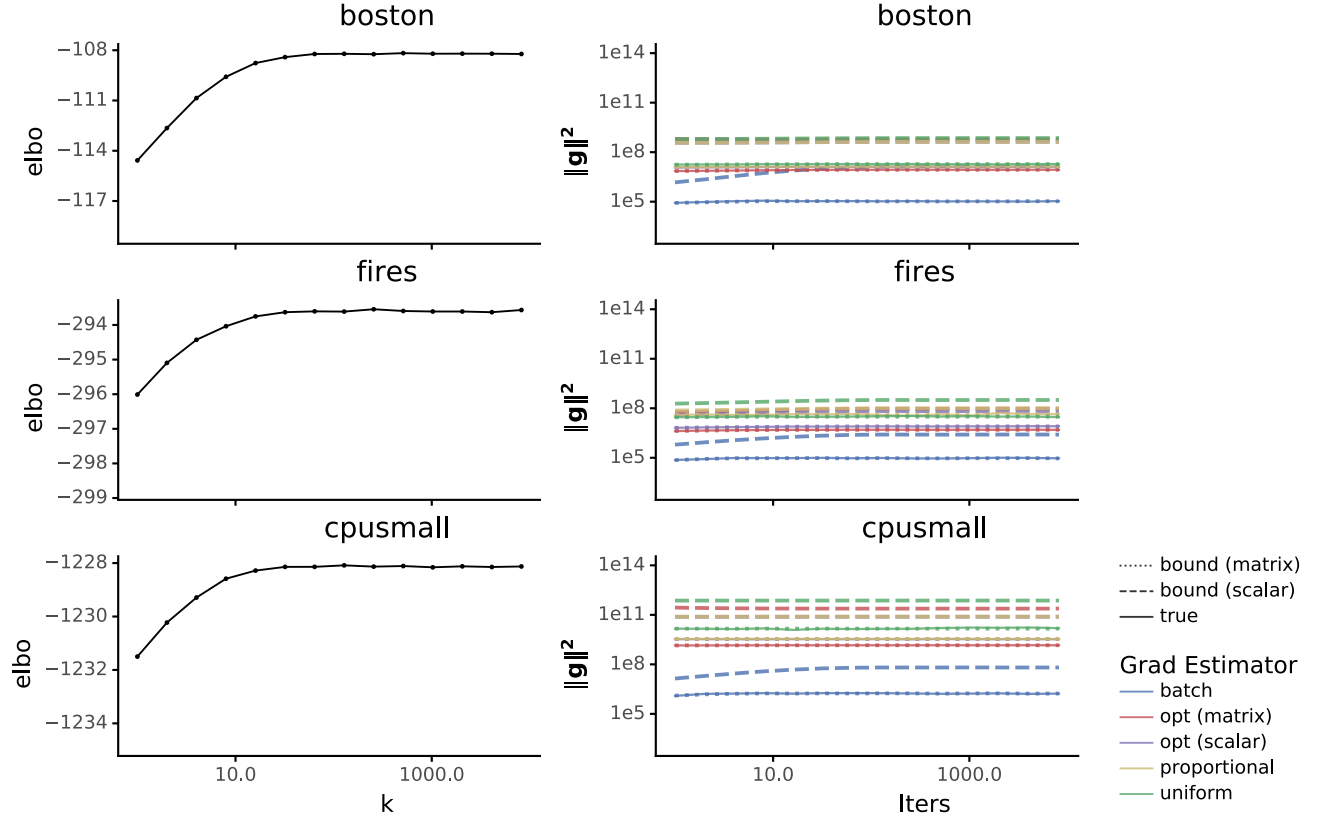

Figure 3: More results in the same setting as Fig. 1 (regression data)

## 6 Additional Experimental Results

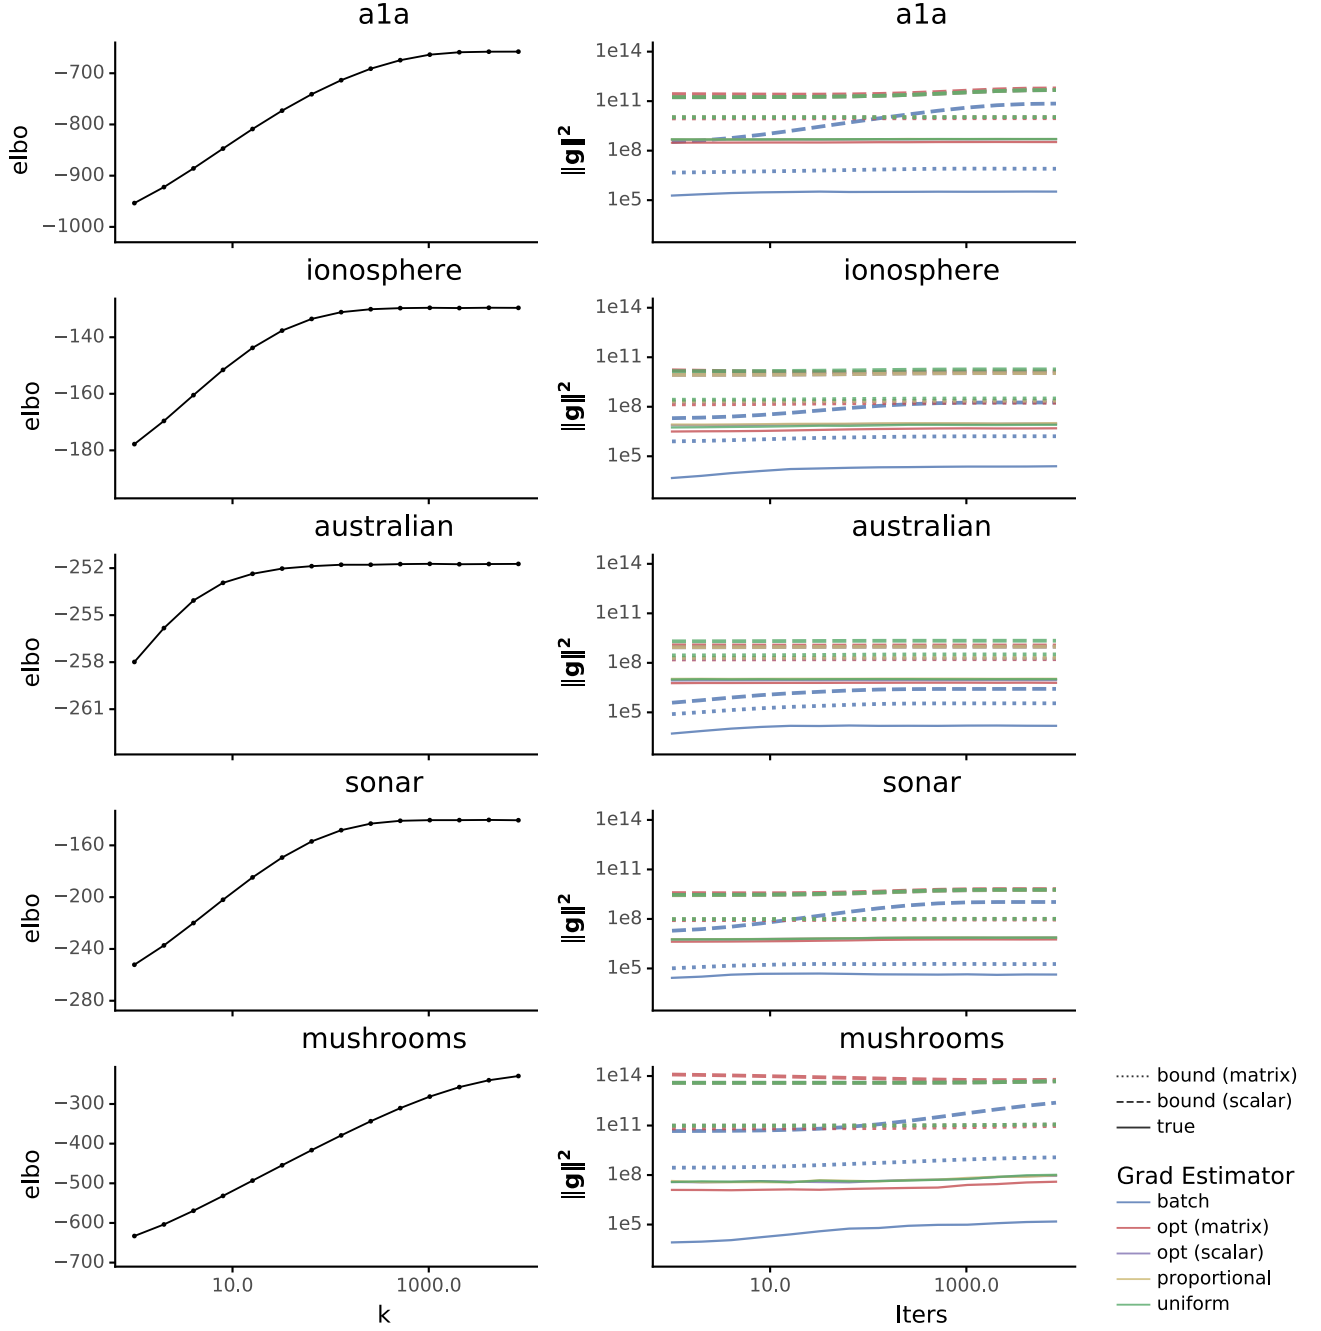

Figure 4: More results in the same setting as Fig. 1 (classification data)

## 7 Proofs

### 7.1 Proof of [Lem. 1](#)

The following result is helpful for establishing [Lem. 1](#).

**Lemma 8.** *If  $\nabla_{\mathbf{w}} \mathbf{t}_{\mathbf{w}}(\mathbf{u})$  is Jacobian-transpose of  $\mathbf{t}_{\mathbf{w}}(\mathbf{u})$  with respect to  $\mathbf{w}$ , then*

$$\nabla_{\mathbf{w}} \mathcal{T}_{\mathbf{w}}(\mathbf{u})^\top \nabla_{\mathbf{w}} \mathcal{T}_{\mathbf{w}}(\mathbf{u}) = I(1 + \|\mathbf{u}\|_2^2).$$

*Proof.* We use the notation  $\nabla_{\mathbf{w}} \mathcal{T}_{\mathbf{w}}(\mathbf{u}) = \frac{d\mathcal{T}_{\mathbf{w}}(\mathbf{u})}{d\mathbf{w}}^\top$ , meaning that  $(\nabla_{\mathbf{w}} \mathcal{T}_{\mathbf{w}}(\mathbf{u}))_{ij} = \frac{d\mathcal{T}_{\mathbf{w}}(\mathbf{u})_j}{dw_i}$ .

Each row of  $\nabla_{\mathbf{w}} \mathbf{t}_{\mathbf{w}}(\mathbf{u})$  consists of the partial derivative of  $\mathbf{t}_{\mathbf{w}}(\mathbf{u})$  with respect to one component of  $\mathbf{w}$ . Thus, the product is

$$\begin{aligned} (\nabla_{\mathbf{w}} \mathcal{T}_{\mathbf{w}}(\mathbf{u}))^\top (\nabla_{\mathbf{w}} \mathcal{T}_{\mathbf{w}}(\mathbf{u})) &= \sum_i \left( \frac{d}{dw_i} \mathcal{T}(\mathbf{u}) \right) \left( \frac{d}{dw_i} \mathcal{T}(\mathbf{u}) \right)^\top \\ &= \sum_i \mathbf{a}_i(\mathbf{u}) \mathbf{a}_i(\mathbf{u})^\top. \end{aligned}$$

We can calculate these components as

$$\begin{aligned} \left( \frac{d}{dm_i} \mathcal{T}_{\mathbf{w}}(\mathbf{u}) \right) \left( \frac{d}{dm_i} \mathcal{T}_{\mathbf{w}}(\mathbf{u}) \right)^\top &= \mathbf{e}_i \mathbf{e}_i^\top \\ \left( \frac{d}{dS_{ij}} \mathcal{T}_{\mathbf{w}}(\mathbf{u}) \right) \left( \frac{d}{dS_{ij}} \mathcal{T}_{\mathbf{w}}(\mathbf{u}) \right)^\top &= (u_j \mathbf{e}_i) (u_j \mathbf{e}_i)^\top \\ &= u_j^2 \mathbf{e}_i \mathbf{e}_i^\top \end{aligned}$$

Adding the components up, we get that

$$\begin{aligned} (\nabla_{\mathbf{w}} \mathcal{T}_{\mathbf{w}}(\mathbf{u}))^\top (\nabla_{\mathbf{w}} \mathcal{T}_{\mathbf{w}}(\mathbf{u})) &= \sum_i \left( \frac{d}{dm_i} \mathcal{T}_{\mathbf{w}}(\mathbf{u}) \right) \left( \frac{d}{dm_i} \mathcal{T}_{\mathbf{w}}(\mathbf{u}) \right)^\top + \sum_{i,j} \left( \frac{d}{dS_{ij}} \mathcal{T}_{\mathbf{w}}(\mathbf{u}) \right) \left( \frac{d}{dS_{ij}} \mathcal{T}_{\mathbf{w}}(\mathbf{u}) \right)^\top \\ &= \sum_i \mathbf{e}_i \mathbf{e}_i^\top + \sum_{i,j} u_j^2 \mathbf{e}_i \mathbf{e}_i^\top \\ &= I(1 + \|\mathbf{u}\|_2^2). \end{aligned}$$

The following is the main Lemma. □

**Lemma 1.** *For any  $\mathbf{w}$  and  $\mathbf{u}$ ,  $\|\nabla_{\mathbf{w}} f(\mathcal{T}_{\mathbf{w}}(\mathbf{u}))\|_2^2 = \|\nabla f(\mathcal{T}_{\mathbf{w}}(\mathbf{u}))\|_2^2 (1 + \|\mathbf{u}\|_2^2)$ .*

*Proof.* Using [Lemma 8](#), we can show that

$$\begin{aligned} \|\nabla_{\mathbf{w}} f(\mathcal{T}_{\mathbf{w}}(\mathbf{u}))\|_2^2 &= \|\nabla_{\mathbf{w}} \mathcal{T}_{\mathbf{w}}(\mathbf{u}) \nabla f(\mathcal{T}_{\mathbf{w}}(\mathbf{u}))\|_2^2 \\ &= \nabla f(\mathcal{T}_{\mathbf{w}}(\mathbf{u}))^\top \nabla_{\mathbf{w}} \mathcal{T}_{\mathbf{w}}(\mathbf{u})^\top \nabla_{\mathbf{w}} \mathcal{T}_{\mathbf{w}}(\mathbf{u}) \nabla f(\mathcal{T}_{\mathbf{w}}(\mathbf{u})) \\ &= \nabla f(\mathcal{T}_{\mathbf{w}}(\mathbf{u}))^\top \left( I(1 + \|\mathbf{u}\|_2^2) \right) \nabla f(\mathcal{T}_{\mathbf{w}}(\mathbf{u})) \\ &= \|\nabla f(\mathcal{T}_{\mathbf{w}}(\mathbf{u}))\|_2^2 (1 + \|\mathbf{u}\|_2^2). \end{aligned}$$

□

## 7.2 Proof of Lem. 2

A few distributional properties are needed before proving Lem. 2.

**Lemma 9.** Suppose that  $\mathbf{u} = (u_1, \dots, u_d)$  is random variable over  $\mathbb{R}^d$  with zero-mean iid components. Then

$$\begin{aligned}\mathbb{E} \mathbf{u} \mathbf{u}^\top &= \mathbb{E}[u_1^2] I \\ \mathbb{E} \|\mathbf{u}\|_2^2 &= d \mathbb{E}[u_1^2] \\ \mathbb{E} \mathbf{u} (1 + \|\mathbf{u}\|_2^2) &= \mathbf{1} \mathbb{E}[u_1^3] \\ \mathbb{E} \mathbf{u} \mathbf{u}^\top \mathbf{u} \mathbf{u}^\top &= ((d-1) \mathbb{E}[u_1^2]^2 + \mathbb{E}[u_1^4]) I.\end{aligned}$$

*Proof.* ( $\mathbb{E} \mathbf{u} \mathbf{u}^\top$ ) Take any pair of indices  $i$  and  $j$ . Then,  $(\mathbb{E} \mathbf{u} \mathbf{u}^\top)_{ij} = \mathbb{E} u_i u_j$ . If  $i \neq j$  this is zero. Otherwise it is  $\mathbb{E} u_i^2$ . Thus,  $\mathbb{E} \mathbf{u} \mathbf{u}^\top = \mathbb{E}[u_1^2] I$ .

( $\mathbb{E} \|\mathbf{u}\|_2^2$ ) This follows from the previous result as

$$\mathbb{E} \|\mathbf{u}\|_2^2 = \mathbb{E} \text{tr} \mathbf{u} \mathbf{u}^\top = \text{tr} \mathbb{E} \mathbf{u} \mathbf{u}^\top = \text{tr} \mathbb{E}[u_1^2] I = d \mathbb{E}[u_1^2].$$

( $\mathbb{E} \mathbf{u} (1 + \|\mathbf{u}\|_2^2)$ ) If  $x$  and  $y$  are independent,  $\mathbb{E} xy = (\mathbb{E} x)(\mathbb{E} y)$ . Thus, since the first and third moments of  $u_i$  are zero,

$$\begin{aligned}\mathbb{E} \mathbf{u} (1 + \|\mathbf{u}\|_2^2)_i &= \mathbb{E} u_i (1 + \sum_{j=1}^d u_j^2) \\ &= \mathbb{E}[u_i] + \mathbb{E}[u_i^3] + \sum_{j \neq i} \mathbb{E}[u_i] \mathbb{E}[u_j^2] \\ &= \mathbb{E}[u_i^3].\end{aligned}$$

( $\mathbb{E} \mathbf{u} \mathbf{u}^\top \mathbf{u} \mathbf{u}^\top$ ) It is useful to represent this term as

$$\begin{aligned}(\mathbb{E} \mathbf{u} \mathbf{u}^\top \mathbf{u} \mathbf{u}^\top)_{ij} &= \mathbb{E} u_i u_j \|\mathbf{u}\|_2^2 \\ &= \mathbb{E} u_i u_j \sum_k u_k^2.\end{aligned}$$

First, suppose that  $i \neq j$ . Then this is

$$\begin{aligned}(\mathbb{E} \mathbf{u} \mathbf{u}^\top \mathbf{u} \mathbf{u}^\top)_{ij} &= \mathbb{E} u_i u_j \sum_k u_k^2 \\ &= \mathbb{E} u_i u_j \left( u_i^2 + u_j^2 + \sum_{k \notin \{i,j\}} u_k^2 \right) \\ &= 0.\end{aligned}$$

This is zero since  $u_i$ ,  $u_j$  and  $u_k$  are independent, and each term contains at least one of  $u_i$  or  $u_j$  to the first power. Since  $\mathbb{E} u_i = 0$ , the full expectation is zero.

On the other hand, suppose that  $i = j$ . Then this is

$$\begin{aligned}(\mathbb{E} \mathbf{u} \mathbf{u}^\top \mathbf{u} \mathbf{u}^\top)_{ii} &= \mathbb{E} u_i^2 \left( u_i^2 + \sum_{k \neq i} u_k^2 \right) \\ &= \mathbb{E} \left( u_i^4 + u_i^2 \sum_{k \neq i} u_k^2 \right) \\ &= \mathbb{E}[u_1^4] + (d-1) \mathbb{E}[u_1^2]^2\end{aligned}$$

If we put this together, we get that

$$\mathbb{E} \mathbf{u} \mathbf{u}^\top \mathbf{u} \mathbf{u}^\top = ((d-1) \mathbb{E}[u_1^2]^2 + \mathbb{E}[u_1^4]) I.$$

□

**Lemma 2.** Let  $\mathbf{u} \sim s$  for  $s$  standardized with  $\mathbf{u} \in \mathbb{R}^d$  and  $\mathbb{E}_{\mathbf{u} \sim s} u_i^4 = \kappa$ . Then for any  $\bar{\mathbf{z}}$ ,

$$\mathbb{E} \|\mathcal{T}_w(\mathbf{u}) - \bar{\mathbf{z}}\|_2^2 (1 + \|\mathbf{u}\|_2^2) = (d+1) \|\mathbf{m} - \bar{\mathbf{z}}\|_2^2 + (d + \kappa) \|C\|_F^2.$$

*Proof.* We simply split the expectation up and calculate each part.

$$\begin{aligned} \mathbb{E} \|\mathcal{T}_w(\mathbf{u}) - \bar{\mathbf{z}}\|_2^2 (1 + \|\mathbf{u}\|_2^2) &= \mathbb{E} \|C\mathbf{u} + \mathbf{m} - \bar{\mathbf{z}}\|_2^2 (1 + \|\mathbf{u}\|_2^2) \\ &= \mathbb{E} \left( \|C\mathbf{u}\|_2^2 + 2(\mathbf{m} - \bar{\mathbf{z}})^\top C\mathbf{u} + \|\mathbf{m} - \bar{\mathbf{z}}\|_2^2 \right) (1 + \|\mathbf{u}\|_2^2) \\ \mathbb{E} \|C\mathbf{u}\|_2^2 (1 + \|\mathbf{u}\|_2^2) &= \mathbb{E} \|C\mathbf{u}\|_2^2 + \mathbb{E} \|C\mathbf{u}\|_2^2 \|\mathbf{u}\|_2^2 \\ \mathbb{E} \|C\mathbf{u}\|_2^2 &= \mathbb{E} \text{tr} \mathbf{u}^\top C^\top C \mathbf{u} \\ &= \text{tr} C^\top C \mathbb{E} \mathbf{u} \mathbf{u}^\top \\ &= \text{tr} C^\top C \mathbb{E}[\mathbf{u}_1^2] I \\ &= \mathbb{E}[\mathbf{u}_1^2] \text{tr} C^\top C \\ \mathbb{E} \|C\mathbf{u}\|_2^2 \|\mathbf{u}\|_2^2 &= \mathbb{E} \text{tr} \mathbf{u}^\top C^\top C \mathbf{u} \mathbf{u}^\top \mathbf{u} \\ &= \text{tr} C^\top C \mathbb{E} \mathbf{u} \mathbf{u}^\top \mathbf{u} \mathbf{u}^\top \\ &= \text{tr} C^\top C ((d-1) \mathbb{E}[\mathbf{u}_1^2]^2 + \mathbb{E}[\mathbf{u}_1^4]) I \\ &= ((d-1) \mathbb{E}[\mathbf{u}_1^2]^2 + \mathbb{E}[\mathbf{u}_1^4]) \text{tr} C^\top C \\ \mathbb{E} \|C\mathbf{u}\|_2^2 (1 + \|\mathbf{u}\|_2^2) &= (\mathbb{E}[\mathbf{u}_1^2] + (d-1) \mathbb{E}[\mathbf{u}_1^2]^2 + \mathbb{E}[\mathbf{u}_1^4]) \text{tr} C^\top C \\ \mathbb{E} (\mathbf{m} - \bar{\mathbf{z}})^\top C \mathbf{u} (1 + \|\mathbf{u}\|_2^2) &= (\mathbf{m} - \bar{\mathbf{z}})^\top C \mathbb{E} \mathbf{u} (1 + \|\mathbf{u}\|_2^2) \\ &= (\mathbf{m} - \bar{\mathbf{z}})^\top C \mathbf{1} \mathbb{E}[\mathbf{u}_1^3] \\ &= 0 \\ \mathbb{E} \|\mathbf{m} - \bar{\mathbf{z}}\|_2^2 (1 + \|\mathbf{u}\|_2^2) &= \|\mathbf{m} - \bar{\mathbf{z}}\|_2^2 \mathbb{E}(1 + \|\mathbf{u}\|_2^2) \\ &= \|\mathbf{m} - \bar{\mathbf{z}}\|_2^2 (1 + d \mathbb{E}[\mathbf{u}_1^2]). \end{aligned}$$

Adding all this up gives that

$$\mathbb{E} \|\mathcal{T}_w(\mathbf{u}) - \bar{\mathbf{z}}\|_2^2 (1 + \|\mathbf{u}\|_2^2) = (1 + d \mathbb{E}[\mathbf{u}_1^2]) \|\mathbf{m} - \bar{\mathbf{z}}\|_2^2 + (\mathbb{E}[\mathbf{u}_1^2] + (d-1) \mathbb{E}[\mathbf{u}_1^2]^2 + \mathbb{E}[\mathbf{u}_1^4]) \|C\|_F^2.$$

In the case that the variance is one, this becomes

$$\mathbb{E} \|\mathcal{T}_w(\mathbf{u}) - \bar{\mathbf{z}}\|_2^2 (1 + \|\mathbf{u}\|_2^2) = (d+1) \|\mathbf{m} - \bar{\mathbf{z}}\|_2^2 + (d + \mathbb{E}[\mathbf{u}_1^4]) \|C\|_F^2.$$

□

### 7.3 Proof of Thm. 7

**Theorem 7.** For any symmetric matrices  $M_1, \dots, M_N$  and vectors  $\bar{z}_1, \dots, \bar{z}_N$ , there are functions  $f_1, \dots, f_N$  such that (1)  $f_n$  is  $M_n$ -matrix-smooth and has a stationary point at  $\bar{z}_n$  and (2) if  $s$  is standardized with  $\mathbf{u} \in \mathbb{R}^d$  and  $\mathbb{E} \mathbf{u}_i^4 = \kappa$ , then for  $\mathbf{g} = \frac{1}{\pi(n)} \nabla f_n(\mathcal{T}_{\mathbf{w}}(\mathbf{u}))$ ,

$$\text{tr } \mathbb{V} \|\mathbf{g}\|_2^2 \geq \sum_{n=1}^N \frac{1}{\pi(n)} \left( d \|M_n(\mathbf{m} - \bar{z}_n)\|_2^2 + (d + \kappa - 1) \|M_n C\|_F^2 \right).$$

*Proof.* First, take any matrix  $M$  and vector  $\bar{z}$ . Define

$$f(\mathbf{z}) = \frac{1}{2}(\mathbf{z} - \bar{z})^\top M(\mathbf{z} - \bar{z}).$$

We can calculate that

$$\begin{aligned} l(\mathbf{w}) &= \mathbb{E}_{\mathbf{z} \sim q_{\mathbf{w}}} \frac{1}{2}(\mathbf{z} - \bar{z})^\top M(\mathbf{z} - \bar{z}) \\ &= \mathbb{E}_{\mathbf{z} \sim q_{\mathbf{w}}} \frac{1}{2} \mathbf{z}^\top M \mathbf{z} - \mathbb{E}_{\mathbf{z} \sim q_{\mathbf{w}}} \bar{z}^\top M \mathbf{z} + \mathbb{E}_{\mathbf{z} \sim q_{\mathbf{w}}} \frac{1}{2} \bar{z}^\top M \bar{z} \\ &= \mathbb{E}_{\mathbf{z} \sim q_{\mathbf{w}}} \frac{1}{2} \text{tr } M \mathbf{z} \mathbf{z}^\top - \bar{z}^\top M \mathbf{m} + \frac{1}{2} \bar{z}^\top M \bar{z} \\ &= \frac{1}{2} \text{tr } M(\mathbf{m} \mathbf{m}^\top + C C^\top) - \bar{z}^\top M \mathbf{m} + \frac{1}{2} \bar{z}^\top M \bar{z} \\ &= \frac{1}{2} \mathbf{m}^\top M \mathbf{m} + \frac{1}{2} \text{tr } M C C^\top - \bar{z}^\top M \mathbf{m} + \frac{1}{2} \bar{z}^\top M \bar{z} \\ &= \frac{1}{2}(\mathbf{m} - \bar{z})^\top M(\mathbf{m} - \bar{z}) + \frac{1}{2} \text{tr } M C C^\top. \end{aligned}$$

Thus, we have that

$$\begin{aligned} \frac{dl}{d\mathbf{m}} &= M(\mathbf{m} - \bar{z}) \\ \frac{dl}{dC} &= MC \end{aligned}$$

If we add up components, we get that

$$\|\mathbb{E} \mathbf{g}\|_2^2 = \|\nabla l(\mathbf{w})\|_2^2 = \|M(\mathbf{m} - \bar{z})\|_2^2 + \|MC\|_F^2.$$

Now, given a sequence  $M_1, \dots, M_N$  and  $\bar{z}_1, \dots, \bar{z}_N$ , if we choose

$$f_n(\mathbf{z}) = \frac{1}{2}(\mathbf{z} - \bar{z}_n)^\top M_n(\mathbf{z} - \bar{z}_n),$$

The true gradient will be

$$\begin{aligned} \frac{dl}{d\mathbf{m}} &= \sum_{n=1}^N M_n(\mathbf{m} - \bar{z}_n) \\ \frac{dl}{dC} &= M_n C, \end{aligned}$$

and so, applying Jensen's inequality,

$$\begin{aligned}
\|\mathbb{E} \mathbf{g}\|_2^2 &= \|\nabla l(\mathbf{w})\|_2^2 \\
&= \left\| \sum_{n=1}^N M_n(\mathbf{m} - \bar{\mathbf{z}}_n) \right\|_2^2 + \left\| \sum_{n=1}^N M_n C \right\|_F^2 \\
&= \left\| \sum_{n=1}^N \frac{1}{\pi(n)} \pi(n) M_n(\mathbf{m} - \bar{\mathbf{z}}_n) \right\|_2^2 + \left\| \sum_{n=1}^N \frac{1}{\pi(n)} \pi(n) M_n C \right\|_F^2 \\
&\leq \sum_{n=1}^N \pi(n) \left\| \frac{1}{\pi(n)} M_n(\mathbf{m} - \bar{\mathbf{z}}_n) \right\|_2^2 + \sum_{n=1}^N \pi(n) \left\| \frac{1}{\pi(n)} M_n C \right\|_F^2 \\
&= \sum_{n=1}^N \frac{1}{\pi(n)} \left( \|M_n(\mathbf{m} - \bar{\mathbf{z}}_n)\|_2^2 + \|M_n C\|_F^2 \right).
\end{aligned}$$

**Thm. 6** tells us that

$$\mathbb{E} \|\mathbf{g}\|_2^2 = \sum_{n=1}^N \frac{1}{\pi(n)} \left( (d+1) \|M_n(\mathbf{m} - \bar{\mathbf{z}}_n)\|_2^2 + (d+\kappa) \|M_n C\|_F^2 \right).$$

Thus, we have that

$$\begin{aligned}
\text{tr } \mathbb{V} \|\mathbf{g}\|_2^2 &= \mathbb{E} \|\mathbf{g}\|^2 - \|\mathbb{E} \mathbf{g}\|^2 \\
&\geq \sum_{n=1}^N \frac{1}{\pi(n)} \left( d \|M_n(\mathbf{m} - \bar{\mathbf{z}}_n)\|_2^2 + (d+\kappa-1) \|M_n C\|_F^2 \right).
\end{aligned}$$

□

## 8 Smoothness conditions for linear models

**Lemma 10.** Suppose that  $f(z) = \phi(a^\top z)$ , and that  $|\phi''(t)| \leq \theta$  for all  $t$ . Then,

$$\|\nabla f(y) - \nabla f(z)\|_2 \leq \theta \|a\|_2 |a^\top (y - z)|.$$

*Proof.* Then, we have that

$$\begin{aligned} \|\nabla f(y) - \nabla f(z)\|_2 &= \|a\phi'(a^\top y) - a\phi'(a^\top z)\|_2 \\ &= \|a\|_2 |\phi'(a^\top y) - \phi'(a^\top z)| \\ &= \|a\|_2 \left| \int_{a^\top z}^{a^\top y} \phi''(t) dt \right| \\ &\leq \theta \|a\|_2 |a^\top (y - z)|. \end{aligned}$$

□

**Lemma 11.** Suppose that  $f(z) = f_0(z) + \phi(a^\top z)$  and that  $f_0(z)$  is  $M_0$  smooth. Then, we have that

$$\|\nabla f(y) - \nabla f(z)\|_2 = M_0 \|y - z\|_2 + \theta \|a\|_2 |a^\top (y - z)|.$$

**Lemma 12.** Suppose that  $f(z) = \sum_{i=1}^N \phi(a_i^\top z)$  and that  $0 \leq \phi''(t) \leq \theta$  for all  $t$ . Then,

$$\begin{aligned} \|\nabla f(y) - \nabla f(z)\|_2 &\leq \|M(y - z)\|_2 \\ M &= \theta \sum_{i=1}^N a_i a_i^\top \end{aligned}$$

*Proof.*

$$\begin{aligned} \|\nabla f(y) - \nabla f(z)\|_2 &= \left\| \sum_{i=1}^N a_i \phi'(a_i^\top y) - \sum_{i=1}^N a_i \phi'(a_i^\top z) \right\|_2 \\ &= \left\| \sum_{i=1}^N a_i (\phi'(a_i^\top y) - \phi'(a_i^\top z)) \right\|_2 \\ &= \left\| \sum_{i=1}^N a_i \int_{a_i^\top z}^{a_i^\top y} \phi''(t) dt \right\|_2 \\ &= \left\| \sum_{i=1}^N a_i (a_i^\top y - a_i^\top z) b_i \right\|_2 \\ &\quad -\theta \leq b_i \leq \theta \\ &= \left\| \sum_{i=1}^N b_i a_i a_i^\top (y - z) \right\|_2 \\ &\leq \theta \left\| \left( \sum_{i=1}^N a_i a_i^\top \right) (y - z) \right\|_2 \end{aligned}$$



The final inequality is justified by the following claim:  $\left\| \sum_{i=1}^N b_i a_i a_i^\top (y - z) \right\|_2^2$  is maximized over vectors  $b$  with  $0 \leq b_i \leq \theta$  by setting  $b_i = \theta$  always. To establish this claim observe that

$$\begin{aligned}
\frac{d}{db_k} \left\| \sum_{i=1}^N b_i a_i a_i^\top (y - z) \right\|_2^2 &= \frac{d}{db_k} \left( \sum_{i=1}^N b_i a_i a_i^\top (y - z) \right)^\top \left( \sum_{j=1}^N b_j a_j a_j^\top (y - z) \right) \\
&= \frac{d}{db_k} \sum_{i=1}^N \sum_{j=1}^N b_i b_j (y - z)^\top (a_i a_i^\top a_j a_j^\top) (y - z) \\
&= \frac{d}{db_k} 2 \sum_{j \neq k}^N b_k b_j (y - z)^\top (a_k a_k^\top a_j a_j^\top) (y - z) \\
&\quad + \frac{d}{db_k} b_k^2 (y - z)^\top (a_k a_k^\top a_k a_k^\top) (y - z) \\
&= 2 \sum_{j \neq k}^N b_j (y - z)^\top (a_k a_k^\top a_j a_j^\top) (y - z) \\
&\quad + 2 b_k (y - z)^\top (a_k a_k^\top a_k a_k^\top) (y - z) \\
&= 2 \sum_{j=1}^N b_j (y - z)^\top (a_k a_k^\top a_j a_j^\top) (y - z) \\
&= 2 \sum_{j=1}^N b_j \operatorname{tr} (y - z)^\top (a_k a_k^\top a_j a_j^\top) (y - z) \\
&= 2 \operatorname{tr} a_k a_k^\top \left( \sum_{j=1}^N b_j a_j a_j^\top \right) (y - z) (y - z)^\top \\
&= 2 a_k^\top \left( \sum_{j=1}^N b_j a_j a_j^\top \right) (y - z) (y - z)^\top a_k
\end{aligned}$$

Now, both  $\left( \sum_{j=1}^N b_j a_j a_j^\top \right)$  and  $(y - z) (y - z)^\top$  are real symmetric positive definite matrices. Thus, their product has real non-negative eigenvalues. This means that

$$\frac{d}{db_k} \left\| \sum_{i=1}^N b_i a_i a_i^\top (y - z) \right\|_2^2 \geq 0,$$

i.e. the maximizing  $b$  will set all entries to  $\theta$ . □

**Theorem 13.** Suppose that  $f(z) = \frac{c}{2} \|z\|_2^2 + \sum_{i=1}^N \phi(a_i^\top z)$  and that  $0 \leq \phi''(t) \leq \theta$ . Then,

$$\begin{aligned}
\|\nabla f(y) - \nabla f(z)\|_2 &\leq \|M(y - z)\|_2 \\
M &= cI + \theta \sum_{i=1}^N a_i a_i^\top
\end{aligned}$$

*Proof.* Suppose that  $\nabla f_0(y) - \nabla f_0(z) = c(y - z)$ . Then, we have that

$$\begin{aligned}
\|\nabla f(y) - \nabla f(z)\|_2 &= \left\| \sum_{i=1}^N a_i \phi'(a_i y) - \sum_{i=1}^N a_i \phi'(a_i z) + c(y - z) \right\|_2 \\
&= \left\| \sum_{i=1}^N a_i (\phi'(a_i y) - \phi'(a_i z)) + c(y - z) \right\|_2 \\
&= \left\| \sum_{i=1}^N a_i \int_{a_i^\top z}^{a_i^\top y} \phi''(t) dt + c(y - z) \right\|_2 \\
&= \left\| \sum_{i=1}^N a_i (a_i^\top y - a_i^\top z) b_i + c(y - z) \right\|_2 \\
&\quad -\theta \leq b_i \leq \theta \\
&= \left\| \left( cI + \sum_{i=1}^N b_i a_i a_i^\top \right) (y - z) \right\|_2 \\
&\leq \left\| \left( cI + \theta \sum_{i=1}^N a_i a_i^\top \right) (y - z) \right\|_2.
\end{aligned}$$

The final inequality is justified by the following claim:  $\left\| \sum_{i=1}^N b_i a_i a_i^\top (y - z) \right\|_2^2$  is maximized over vectors  $b$  with  $0 \leq b_i \leq \theta$  by setting  $b_i = \theta$  always. To establish this claim observe that

$$\begin{aligned}
\frac{d}{db_k} \left\| \left( cI + \sum_{i=1}^N b_i a_i a_i^\top \right) (y - z) \right\|_2^2 &= \frac{d}{db_k} \left( \left( cI + \sum_{i=1}^N b_i a_i a_i^\top \right) (y - z) \right)^\top \left( \left( cI + \sum_{j=1}^N b_j a_j a_j^\top \right) (y - z) \right) \\
&= 2 \left( \left( cI + \sum_{i=1}^N b_i a_i a_i^\top \right) (y - z) \right)^\top \frac{d}{db_k} \left( cI + \sum_{i=1}^N b_i a_i a_i^\top \right) (y - z) \\
&= 2 (y - z)^\top \left( cI + \sum_{i=1}^N b_i a_i a_i^\top \right) (cI + b_k a_k a_k^\top) (y - z) \\
&= 2 \operatorname{tr} \left( cI + \sum_{i=1}^N b_i a_i a_i^\top \right) (cI + b_k a_k a_k^\top) (y - z) (y - z)^\top \\
&= 2 \operatorname{tr} \left( cI + \sum_{i=1}^N b_i a_i a_i^\top \right) b_k a_k a_k^\top (y - z) (y - z)^\top \\
&\quad + 2c \operatorname{tr} \left( cI + \sum_{i=1}^N b_i a_i a_i^\top \right) (y - z) (y - z)^\top \\
&= 2b_k \operatorname{tr} a_k^\top (y - z) (y - z)^\top \left( cI + \sum_{i=1}^N b_i a_i a_i^\top \right) a_k \\
&\quad + 2c \operatorname{tr} (y - z)^\top \left( cI + \sum_{i=1}^N b_i a_i a_i^\top \right) (y - z) \\
&\geq 0.
\end{aligned}$$

The last inequality follows from the fact that

$$\left( cI + \sum_{i=1}^N b_i a_i a_i^\top \right)$$

and

$$(y - z)(y - z)^\top$$

are both real, symmetric positive definite matrices.

□

## 9 Specific Models

### 9.1 Linear Model

Suppose that  $p(\mathbf{z}) = \mathcal{N}(\mathbf{z}|0, \frac{1}{c}I)$  and  $p(y_i|\mathbf{x}_i, \mathbf{z}) = \mathcal{N}(y_i|\mathbf{z}^\top \mathbf{x}_i, \frac{1}{b})$ . Then, we have that

$$\begin{aligned}
p(\mathbf{z}) \prod_i p(y_i|\mathbf{x}_i, \mathbf{z}) &\propto \exp\left(-\frac{1}{2c} \|\mathbf{z}\|^2 - \sum_i \frac{1}{2b} (y_i - \mathbf{z}^\top \mathbf{x}_i)^2\right) \\
&= \exp\left(-\frac{c}{2} \|\mathbf{z}\|^2 - \sum_i \frac{b}{2} (y_i - \mathbf{z}^\top \mathbf{x}_i)^2\right) \\
&= \exp\left(-\frac{c}{2} \|\mathbf{z}\|^2 - \frac{b}{2} \|\mathbf{y} - X\mathbf{z}\|_2^2\right) \\
&= \exp\left(-\frac{c}{2} \|\mathbf{z}\|^2 - \frac{b}{2} \|\mathbf{y}\|_2^2 + b\mathbf{y}^\top X\mathbf{z} - \frac{b}{2} \mathbf{z}^\top X^\top X\mathbf{z}\right) \\
&\propto \exp\left(b\mathbf{y}^\top X\mathbf{z} - \frac{1}{2} \mathbf{z}^\top (bX^\top X + cI) \mathbf{z}\right) \\
&= \exp\left(\mathbf{a}^\top \mathbf{z} - \frac{1}{2} \mathbf{z}^\top \Sigma^{-1} \mathbf{z}\right) \\
&\propto \exp\left(-\frac{1}{2} (\mathbf{z} - \Sigma \mathbf{a})^\top \Sigma^{-1} (\mathbf{z} - \Sigma \mathbf{a})\right) \\
&= \exp\left(-\frac{1}{2} (\mathbf{z} - \mu)^\top \Sigma^{-1} (\mathbf{z} - \mu)\right) \\
\\
\Sigma &= (bX^\top X + cI)^{-1} \\
\mu &= \Sigma \mathbf{a} \\
&= (bX^\top X + cI)^{-1} bX^\top \mathbf{y} \\
&= \left(X^\top X + \frac{c}{b} I\right)^{-1} X^\top \mathbf{y}
\end{aligned}$$

## 10 Reparameterization Stuff

### 10.1 Motivation

Suppose that  $\log p(\mathbf{z}, x)$  is something of the form

$$\log p(\mathbf{z}, x) = \mathbf{1}^\top \phi(X\mathbf{z}).$$

We have that

$$\nabla_{\mathbf{z}} \log p(\mathbf{z}, x) = X^\top \phi'(X\mathbf{z})$$

and that

$$\nabla_{\mathbf{z}}^2 \log p(\mathbf{z}, x) = X^\top \phi''(X\mathbf{z}) X.$$

If we suppose that  $0 \leq \phi'' \leq \theta$  (for example this is true with logistic regression with  $\theta = \frac{1}{4}$ ) then we have that

$$0 \preceq \nabla_{\mathbf{z}}^2 \log p(\mathbf{z}, x) \preceq \theta X^\top X.$$

If we were to add a uniform prior, we'd have something like

$$cI \preceq \nabla_{\mathbf{z}}^2 \log p(\mathbf{z}, x) \preceq cI + \theta X^\top X.$$

On the other hand, for Bayesian regression, we'd have something like

$$\theta X^\top X \preceq \nabla_{\mathbf{z}}^2 \log p(\mathbf{z}, x) \preceq \theta X^\top X$$

with  $\theta = 1$ . This offers much stronger possibilities for rescaling.

## 10.2 Divergence

Suppose that  $\log p(z, x)$  is some distribution that is “poorly scaled”. That is, if we compute the condition number, it is quite poor. On the other hand, it could be that for some  $A$  and  $b$ ,  $\log p(Az + b, x)$  is much better-conditioned. The following lemma shows that we are free to re-scale  $p$  in whatever way we want and then have  $q$  target that rescaled distribution. Once that’s done, we can then transform  $q$  back to the original space.

**Lemma 14.** *Suppose that  $p_z(z)$  is some distribution and  $p_y(y)$  is the distribution of  $Az + b$ ,  $z \sim p_z$ , namely*

$$p_y(y) = \frac{1}{|A|} p_z(A^{-1}(y - b)).$$

*Suppose that  $q_y$  is some distribution which is “close” to  $p_y$ . If we define*

$$q_z(z) = |A| q_y(Az + b),$$

*then  $KL(q_z \| p_z) = KL(q_y \| p_y)$ .*

## 10.3 Concrete

**Lemma 15.** *If  $B \preceq C$  then  $A^\top B A \preceq A^\top C A$ .*

## 10.4 Proofs

**Lemma 14.** *Suppose that  $p_z(z)$  is some distribution and  $p_y(y)$  is the distribution of  $Az + b$ ,  $z \sim p_z$ , namely*

$$p_y(y) = \frac{1}{|A|} p_z(A^{-1}(y - b)).$$

*Suppose that  $q_y$  is some distribution which is “close” to  $p_y$ . If we define*

$$q_z(z) = |A| q_y(Az + b),$$

*then  $KL(q_z \| p_z) = KL(q_y \| p_y)$ .*

*Proof.* In more detail, we know that if  $y = T(z)$  then  $\mathbb{P}(z = z) = \mathbb{P}(y = T(z)) |T'(z)|$ . In our case, we use  $T(z) = Az + b$  so we have that

$$p_z(z, x) = p_y(Az + b, x) |A|$$

Intuitively, we should correspondingly define

$$q_z(z) = q_y(Az + b, x) |A|.$$

Then, we have that

$$\begin{aligned} \mathbb{E}_{z \sim q_z} \log \frac{p_z(z, x)}{q_z(z, x)} &= \mathbb{E}_{z \sim q_z} \log \frac{p_y(Az + b, x) |A|}{q_y(Az + b, x) |A|} \\ &= \int q_z(z) \log \frac{p_y(Az + b, x)}{q_y(Az + b, x)} dz \\ &= \int |A| q_y(Az + b, x) \log \frac{p_y(Az + b, x)}{q_y(Az + b, x)} dz \\ &= \int q_y(y, x) \log \frac{p_y(y, x)}{q_y(y, x)} dy \end{aligned}$$

Where in the last line we apply

$$\int f(y) dy = \int f(T(z)) |\nabla T(z)| dz$$

with  $f(y) = q_y(y, x) \log \frac{p_y(y, x)}{q_y(y, x)}$  and  $T(z) = Az + b$ . □

**Lemma 16.** *If  $B \preceq C$  then  $A^\top BA \preceq A^\top CA$ .*

*Proof.* Suppose that  $B \preceq C$  meaning that  $C - B$  is positive definite. Then note that

$$A^\top CA - A^\top BA = A^\top (C - B)A$$

is also positive definite, since for any  $x$ ,

$$\begin{aligned} x^\top A^\top (C - B)Ax &= z^\top (C - B)z, \quad z = Ax. \\ &\geq 0. \end{aligned}$$

Thus we have that

$$A^\top BA \preceq A^\top CA.$$

□

## 11 Gradient Variance with a Full-Covariance Quadratic

Suppose that  $f(z) = \frac{1}{2}(z - \bar{z})^\top M(z - \bar{z})$ . What is the gradient variance? The gradient is  $\nabla f(z) = M(z - \bar{z})$ . Thus, we seem to get that

$$\begin{aligned} \mathbb{E}_{u \sim s} \|\nabla_{\mathbf{w}} f(\mathcal{T}_{\mathbf{w}}(u))\|_2^2 &= \mathbb{E} \|\nabla f(\mathcal{T}_{\mathbf{w}}(u))\|_2^2 (1 + \|u\|_2^2) \\ &= \mathbb{E} \|M(\mathcal{T}_{\mathbf{w}}(u) - \bar{z})\|_2^2 (1 + \|u\|_2^2) \\ &= \mathbb{E} \|MCu + \mathbf{m} - M\bar{z}\|_2^2 (1 + \|u\|_2^2) \\ &= (d+1) \|\mathbf{m} - M\bar{z}\|_2^2 + (d + \mathbb{E}[u_1^4]) \|MC\|_F^2. \end{aligned}$$

The key thing, for this to work is showing that

$$\|\nabla f(y) - \nabla f(z)\|_2 \leq \|M(y - z)\|_2.$$

Certainly, if we had a property like that, we would be in business.

Claim: If  $f$  is  $M$ -smooth in the above sense, then  $\frac{1}{2}z^\top Mz - f(z)$  is convex.

What does the above say about the Hessian? For very close  $y$  and  $z$ ,

$$\nabla f(y) - \nabla f(z) \approx \nabla^2 f(z)(y - z).$$

Thus the bound sort of says that

$$\|\nabla^2 f(z)(y - z)\|_2^2 \leq \|M(y - z)\|_2^2.$$

Or, essentially, that

$$x^\top (\nabla^2 f(z))^2 x \leq x^\top M^2 x.$$
